# Supplementary material
Source: publisher figshare collection journal article supplement (https://acs.figshare.com/ndownloader/files/5431574)
Supplement: Supplementary file 1 [file 5431574]

## Supporting Information

# **Phase Separation and d Electronic Orbitals on Cyclic Degradation in Li-Mn-O Compounds: First-Principles Multiscale Modeling and Experimental Observations**

Duho Kim,<sup>†,||</sup> Jin-Myoung Lim,<sup>†,||</sup> Min-Sik Park,<sup>‡</sup> Kyeongjae Cho,<sup>§</sup> and Maenghyo Cho<sup>\*,†</sup>

<sup>†</sup> Department of Mechanical and Aerospace Engineering, Seoul National University, Gwanak-ro 1, Gwanak-gu, Seoul 08826, Republic of Korea

<sup>‡</sup> Department of Advanced Materials Engineering for Information and Electronics, Kyung Hee University, 1732 Deogyong-daero, Giheung-gu, Yongin 17104, Republic of Korea

<sup>§</sup> Department of Materials Science and Engineering and Department of Physics, University of Texas at Dallas, Richardson, TX 75080, USA

<sup>||</sup>D. Kim and J.-M. Lim contributed equally to this work.

\* E-mail: mhcho@snu.ac.kr (M. Cho)

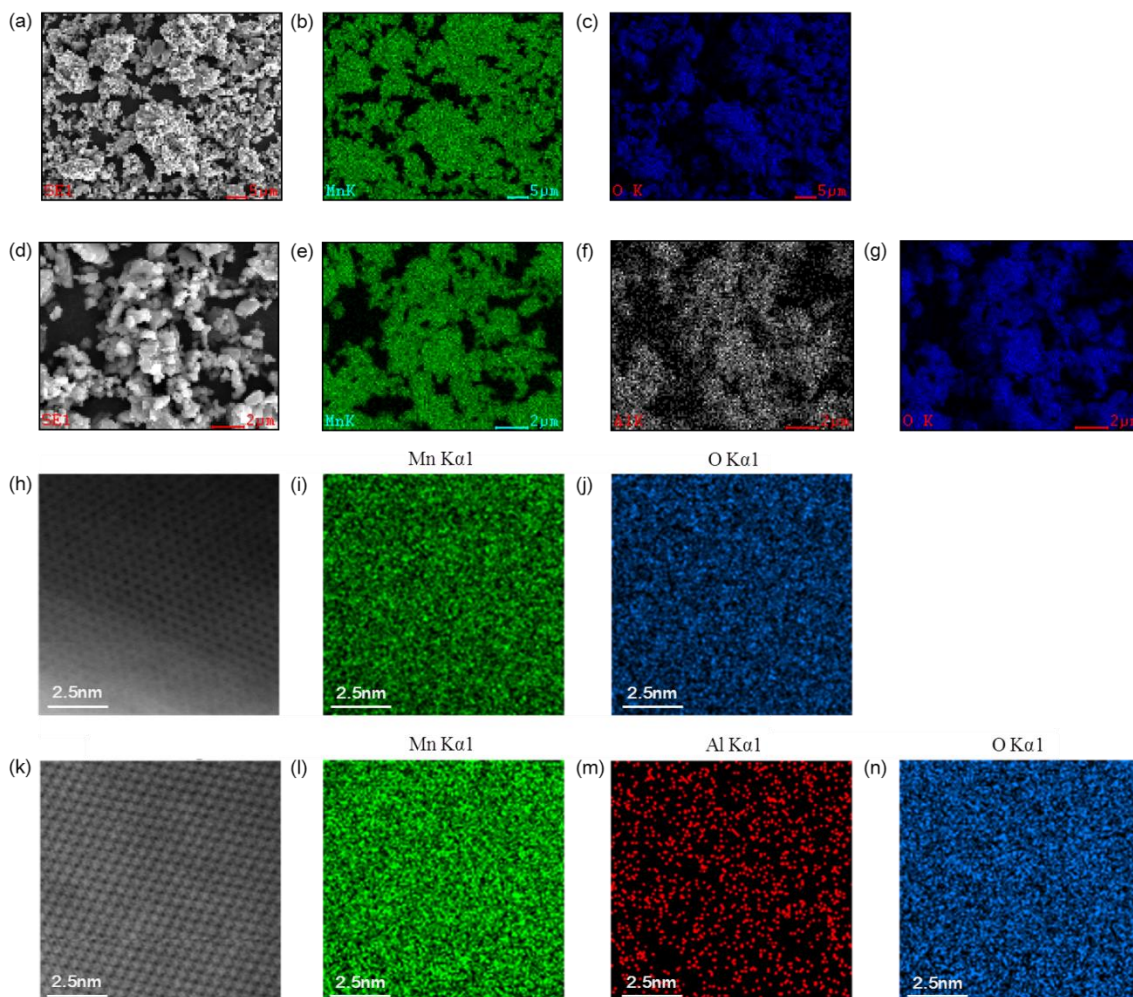

**Figure S1.** FESEM images of (a) LMO and (d) LMAO, corresponding EDS elemental mapping of (b and e) Mn (green), (f) Al (gray), and (c and g) O (blue). STEM images of (h) LMO and (k) LMAO with EDS elemental mapping of (i and l) Mn (green), (m) Al (red), and (j and n) O (blue).

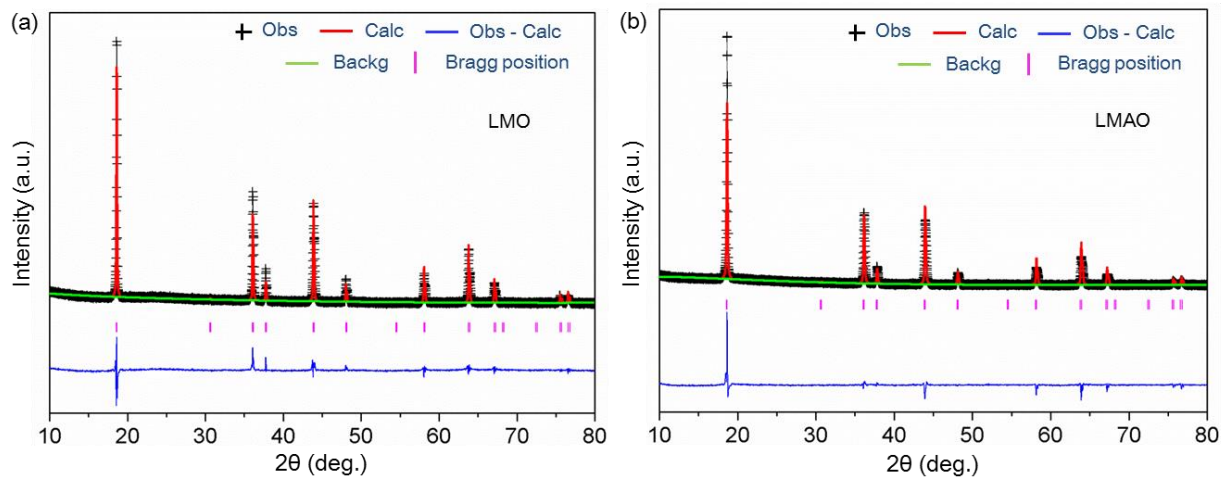

**Figure S2.** Rietveld refinement data from X-ray diffraction patterns of (a) LMO and (b) LMAO.

| Compounds | Region        | $\mathcal{E}_i^f$ [eV] | $\mathcal{K}_i^f$ [eV·nm <sup>2</sup> ] |
|-----------|---------------|------------------------|-----------------------------------------|
| LMO       | 0.0 ~ 0.125   | 0.0                    | 0.0                                     |
|           | 0.125 ~ 0.375 | 44.7386                | 5.7696                                  |
|           | 0.375 ~ 1.0   | 4.0689                 | 0.5247                                  |
| LMAO      | 0.0 ~ 0.25    | 0.0                    | 0.0                                     |
|           | 0.25 ~ 0.625  | 14.2982                | 1.8538                                  |
|           | 0.625 ~ 0.875 | 31.0502                | 4.0257                                  |
|           | 0.875 ~ 1.0   | 0.0                    | 0.0                                     |

**Table S1.** First-principles bulk free energy coefficient,  $\mathcal{E}_i^f$ , and the corresponding gradient energy coefficient,  $\mathcal{K}_i^f$ , at various reaction regions in LMO and LMAO.
